# Supplementary material for: The diagnostic role of diffusional kurtosis imaging in glioma grading and differentiation of gliomas from other intra-axial brain tumours: a systematic review with critical appraisal and meta-analysis
Source: Springer Nature journal article supplement (doi:10.1007/s00234-020-02425-9), 2020-05-04
Supplement: MOESM2 [file 17952322]

## Search Strategy

- Date: 12 July 2018
- Research question: What is the diagnostic accuracy of MRI diffusional kurtosis in 1) differentiating high and low grade gliomas and 2) differentiating gliomas from other primary or secondary brain tumours
- Researchers:
- Librarian: Kate Brunskill (Deputy Librarian, Queen Square Library & Archive)
- Databases:
  - o Pubmed
  - o Medline via ovid
  - o Embase
  - o Scopus
- No language restrictions
- Number of articles:
  - o Before checking for duplicates: 216
  - o After removing of duplicates: 88
  
- Comments:

### 1) PUBMED:

Last search was done on: 12 July 2018

Search syntax:

("Glioma"[Mesh] OR "Brain Neoplasms"[Mesh] OR glioma[TW] OR gliomas[TW] OR brain[TW] AND neoplasm\*[TW])) AND ((diffusion[TW] AND kurtosis[TW]) OR (diffusional[tw] AND kurtosis[TW]) OR DKI[TW] OR "non Gaussian"[TW])

Number of returned articles: 50

---

### 2) Medline via ovid:

Last search was done on: 12 July 2018

Search terminology:

1. diffusional kurtosis.mp.
2. diffusion kurtosis.mp.
3. DKI.mp.
4. non gaussian.mp.
5. 1 or 2 or 3 or 4
6. exp Glioma/

7. exp Brain Neoplasms/

8. (glioma or gliomas or brain neoplasm\*).mp. [mp=title, abstract, original title, name of substance word, subject heading word, keyword heading word, protocol supplementary concept word, rare disease supplementary concept word, unique identifier, synonyms]

9. 6 or 7 or 8

10. 5 and 9

Number of returned articles: 40

---

### 3) Embase

Last search was done on: 12 July 2018

Search engine is same as medline via ovid

1. diffusional kurtosis.mp.

2. diffusion kurtosis.mp.

3. DKI.mp.

4. non gaussian.mp.

5. 1 or 2 or 3 or 4

6. exp Glioma/

7. exp Brain Neoplasms/

8. (glioma or gliomas or brain neoplasm\*).mp. [mp=title, abstract, original title, name of substance word, subject heading word, keyword heading word, protocol supplementary concept word, rare disease supplementary concept word, unique identifier, synonyms]

9. 6 or 7 or 8

10. 5 and 9

Number of returned articles: 69

---

### 4) Scopus

Last search was done on: 12 July 2018

Search syntax: TITLE-ABS-KEY ( *glioma* OR *gliomas* OR "*brain Neoplasm*" OR "*brain neoplams*" ) AND

TITLE-ABS-KEY ( ( *diffusion* AND *kurtosis* ) OR ( *diffusional* AND *kurtosis* ) OR *dki* OR "*non Gaussian*" OR "*non-Gaussian*" )

Number of returned articles: 57
