# Supplementary material for: The diagnostic role of diffusional kurtosis imaging in glioma grading and differentiation of gliomas from other intra-axial brain tumours: a systematic review with critical appraisal and meta-analysis
Source: Springer Nature journal article supplement (doi:10.1007/s00234-020-02425-9), 2020-05-04

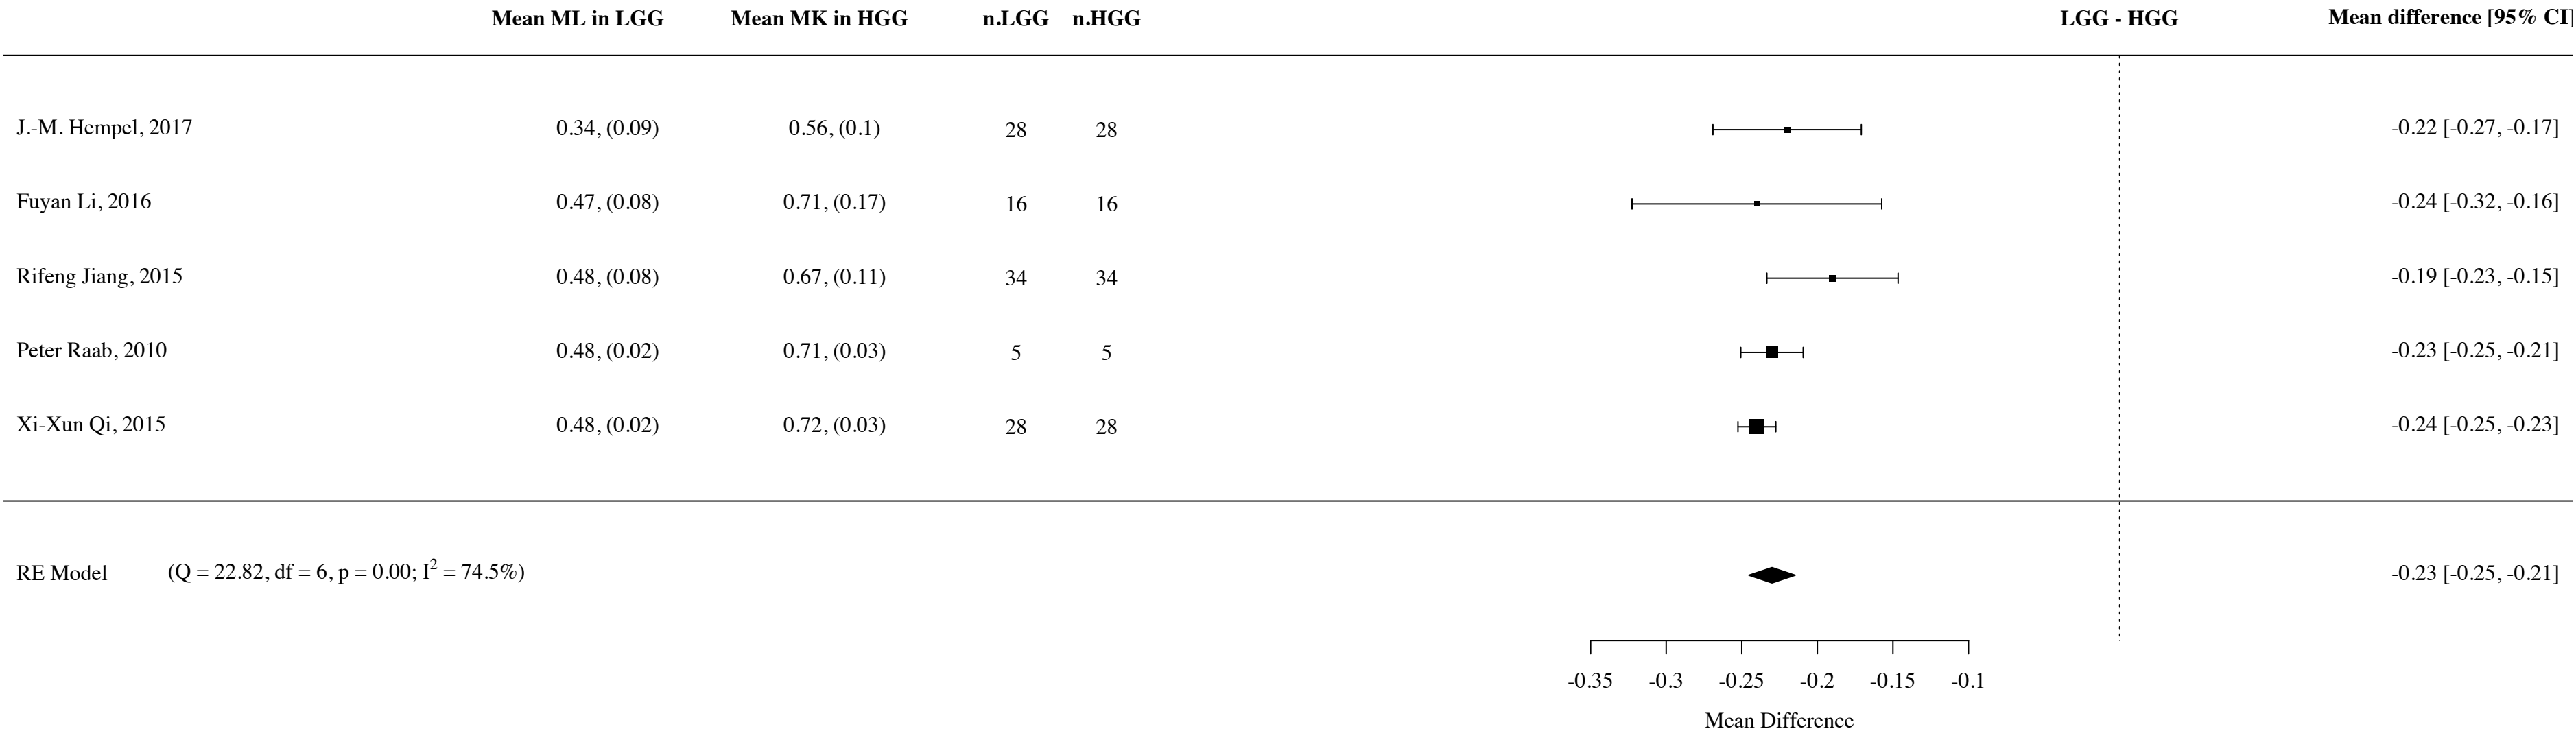

Supplement: MOESM8 [file 17952322]
